# Supplementary material for: The smell of hunger: Norway rats provision social partners based on odour cues of need
Source: PLOS journal article supplement (doi:10.1371/journal.pbio.3000628), 2020-03-24
Supplement: S1 (10.1371/journal.pbio.3000628.s001) [file journal.pbio.3000628.s001]

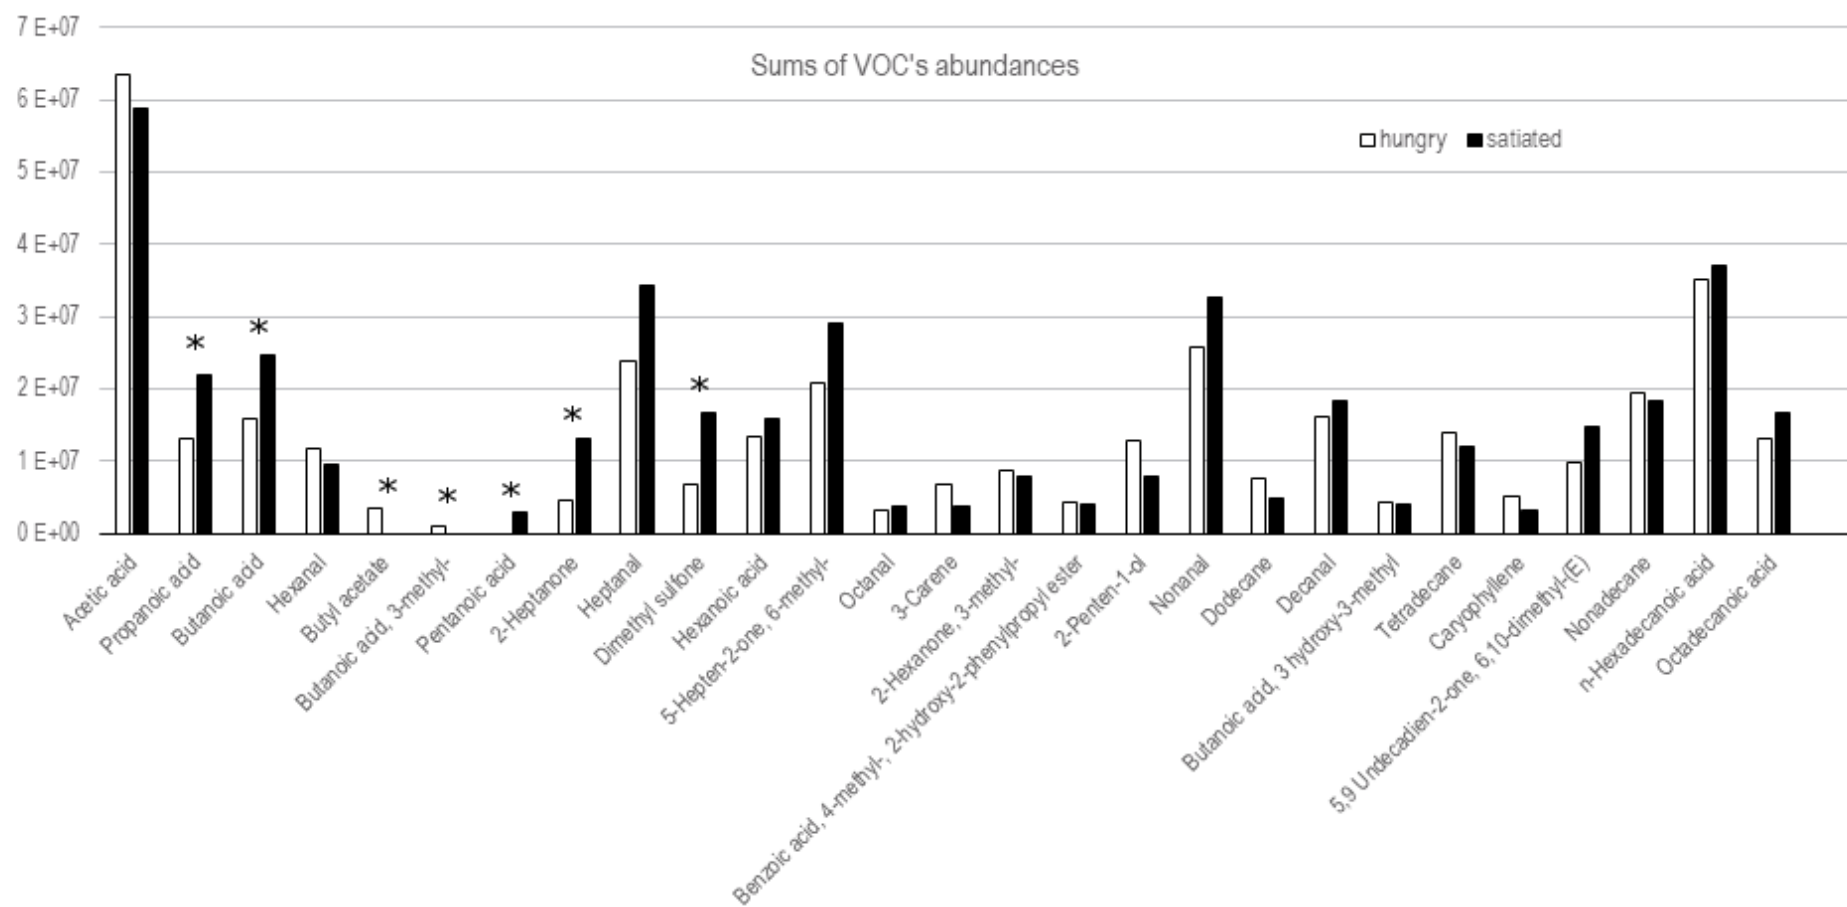

**Supporting Information Figure 1: Sums of volatile organic compounds (VOCs)** collected from either hungry (white) and satiated (black) rats (for raw data see S2\_Data). Relative abundance is measured in number of ions. Significant differences are marked with an asterisk.
